# Supplementary material
Source: MDPI journal article supplement (https://www.mdpi.com/2673-4583/5/1/49)

Alice Mieting

# Precipitation of iron oxide in hydrogel with superparamagnetic and stimuli-responsive properties

CSAC2021: 1st International Electronic Conference on Chemical Sensors and Analytical Chemistry  
01 – 15 July 2021 | Online

# Ferrogel: Iron oxide functionalized hydrogels

Synthesis: In-situ co-precipitation of iron oxide in hydrogels

Characterization: particle properties (size, extent of agglomeration, uniformity distribution)  
swelling properties (ionic strength, pH, specific ions)  
physical properties (magnetization, electric conductivity)

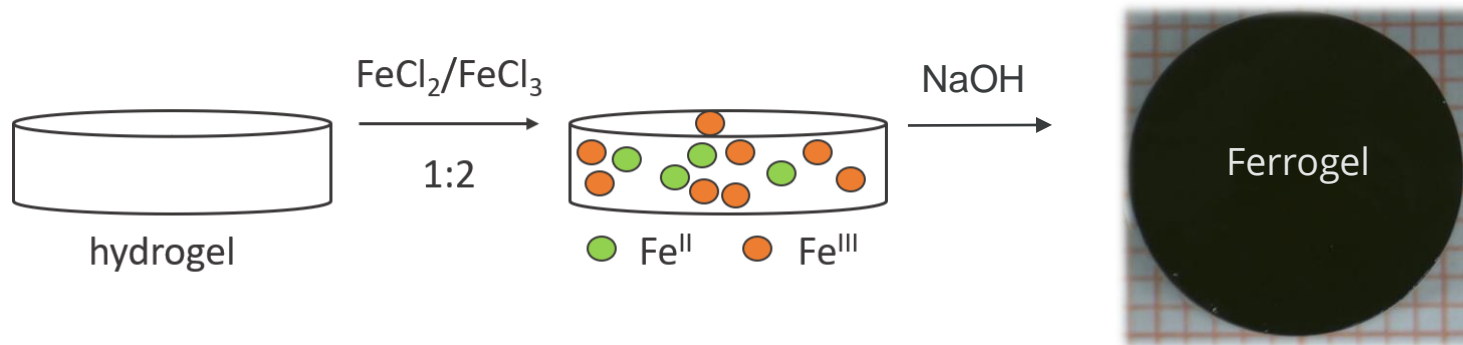

## In-situ method: Co-Precipitation

- Particle size and shape distribution
- Impact on particle size and shape
- (Long-term) stability in aqueous environment
- Reproducibility of physical properties

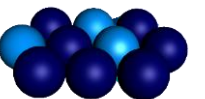

## Fabrication and Modification

- Physical methods
- Wet chemical preparation
- Microbial methods

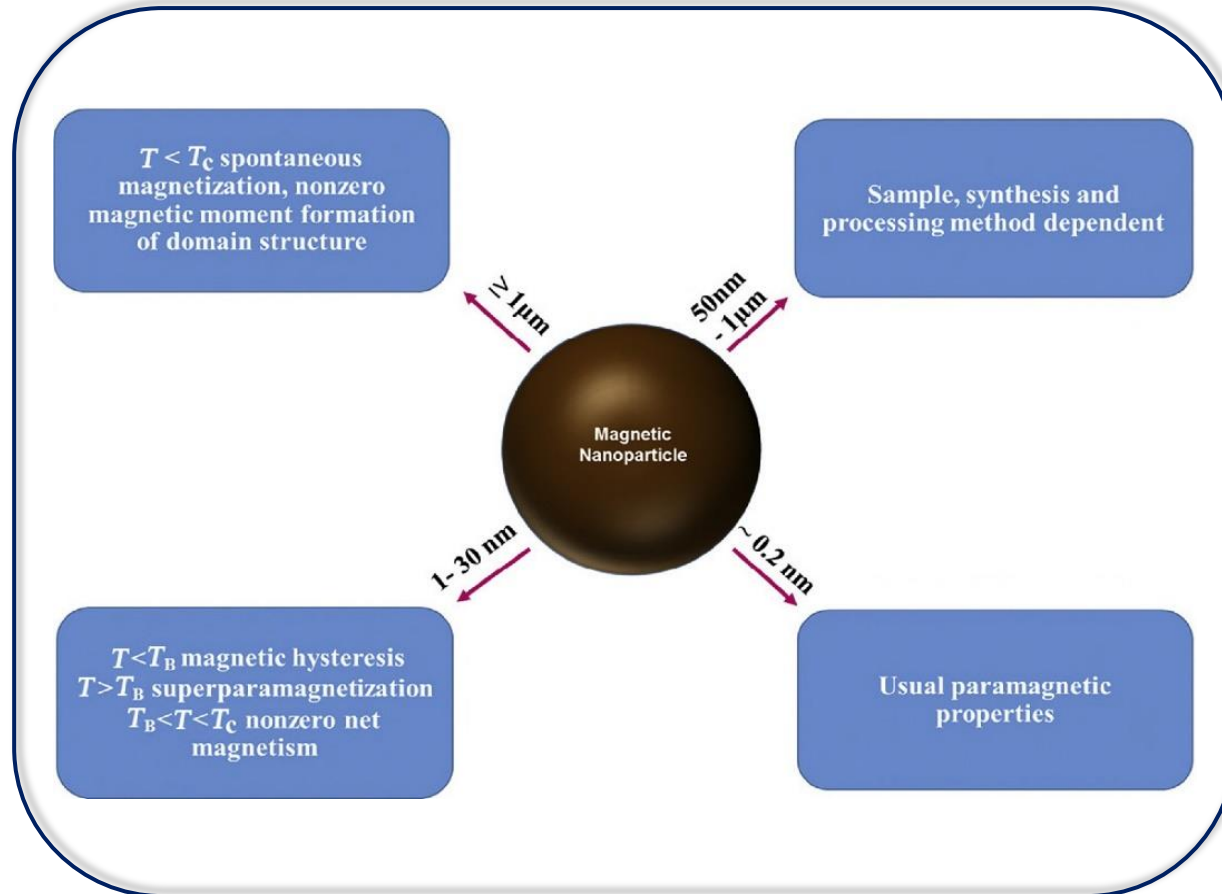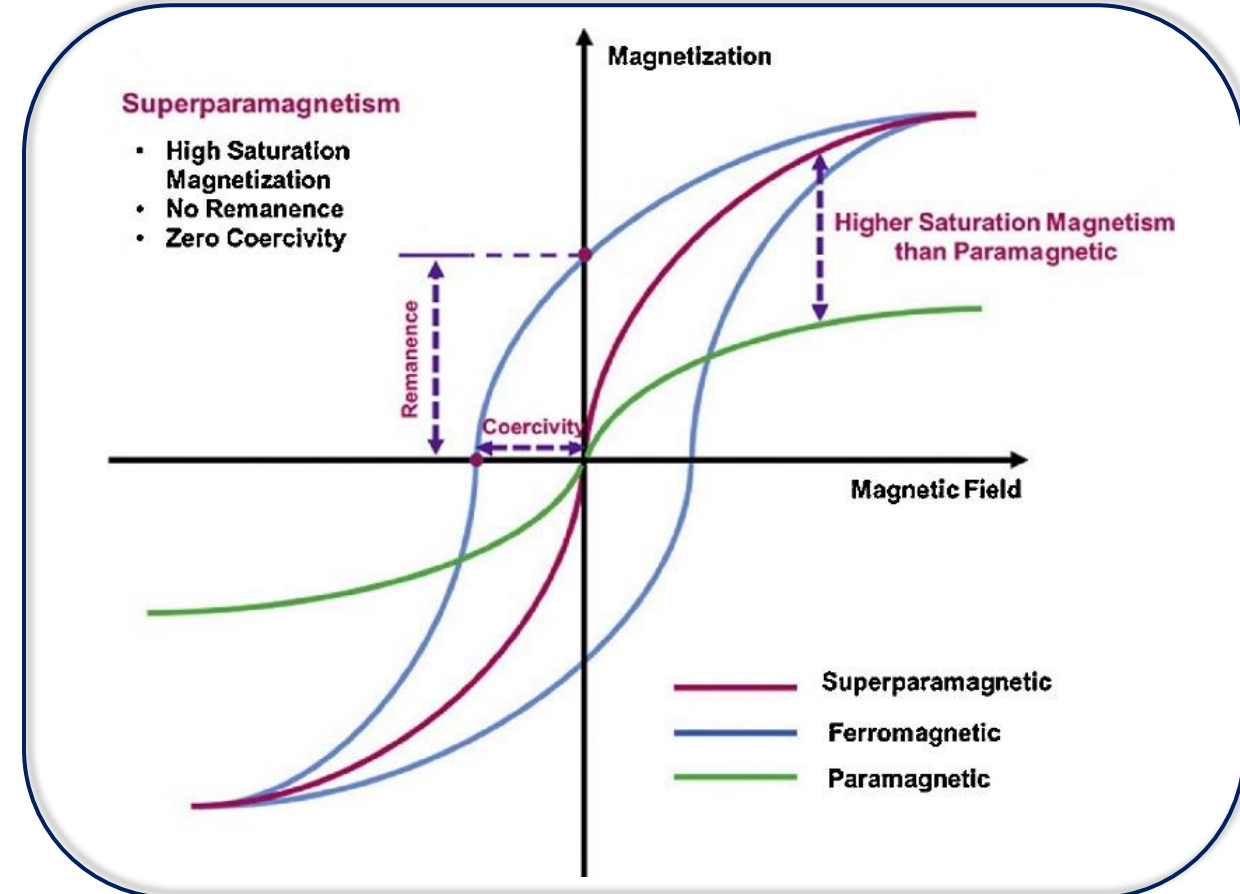

Mohammed et al. *Particuology*, 2017

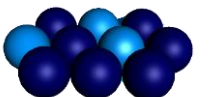

# In-situ ferrogel

## Sensory:

1,6 mol/L AAm  
1,5 mol-% BIS  
0,27 mol-% APS  
2,1 mol-% TEMED

## Actuatory:

2,8 mol/L AAm  
0,03 mol-% BIS  
0,32 mol-% APS  
0,5 mol-% TEMED

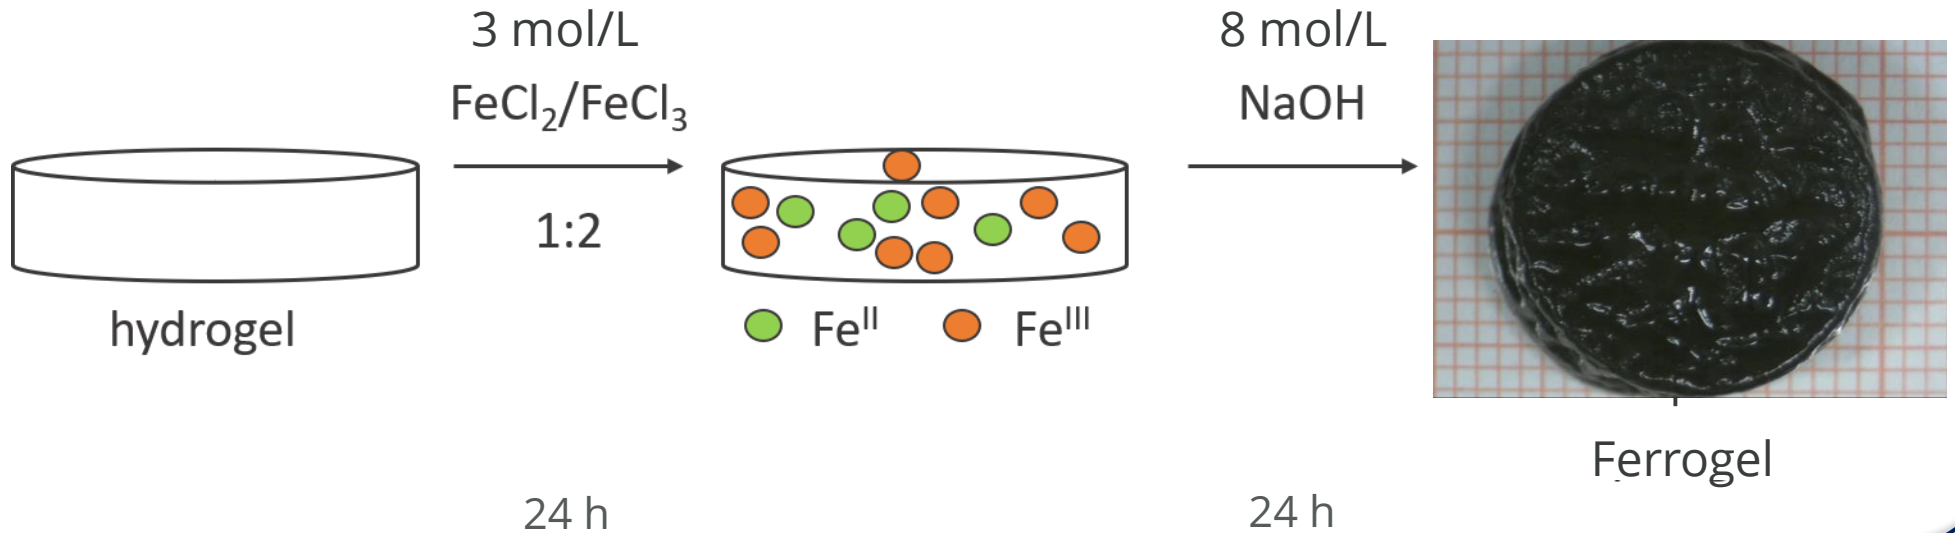

→ Two types of hydrogel:

1,5 mol% vs. 0,03 mol% BIS

→ Dilutions of iron salts and base :

1

1:10

1:100

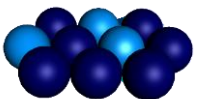

## Sensory Ferrogel

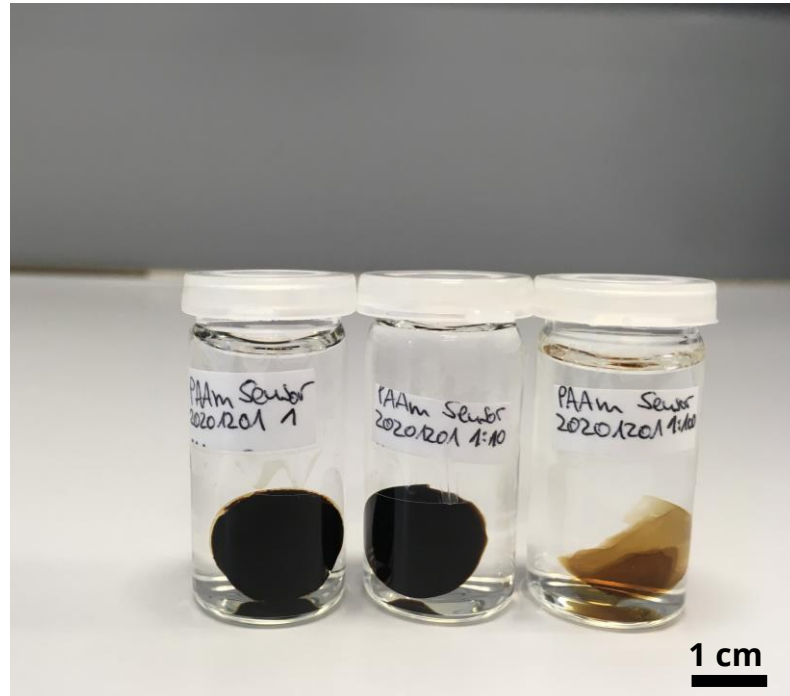

## Actuatory Ferrogel

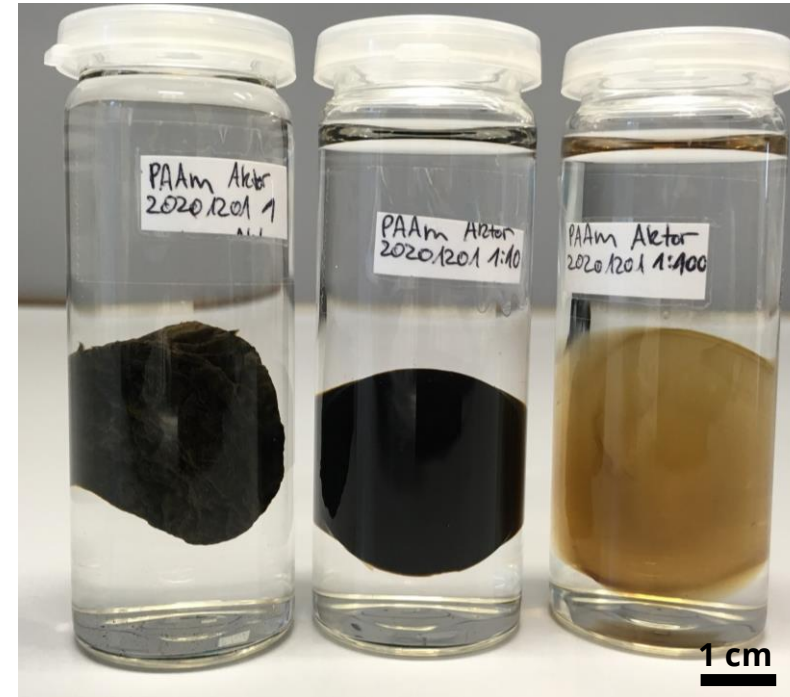

→ black to lightbrown  
→ brittle to soft

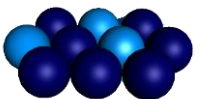



# Sensory Ferrogel

1

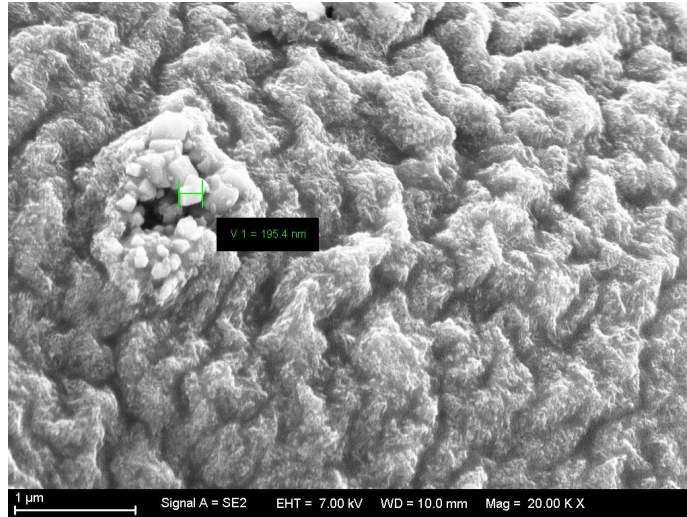

1:10

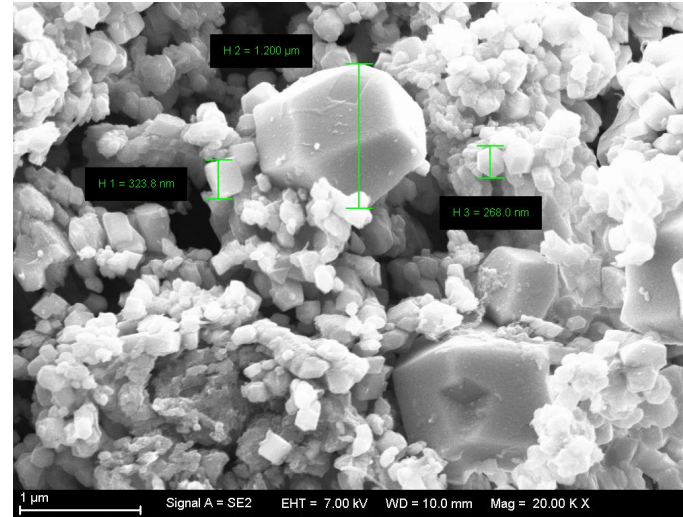

1:100

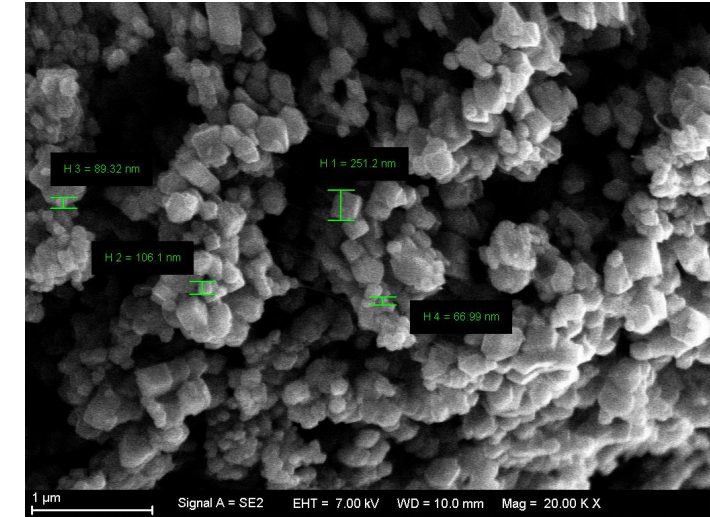

# Actuatory Ferrogel

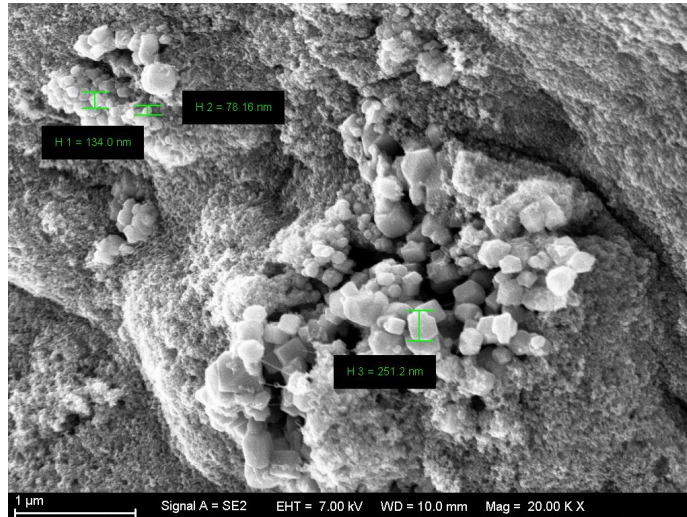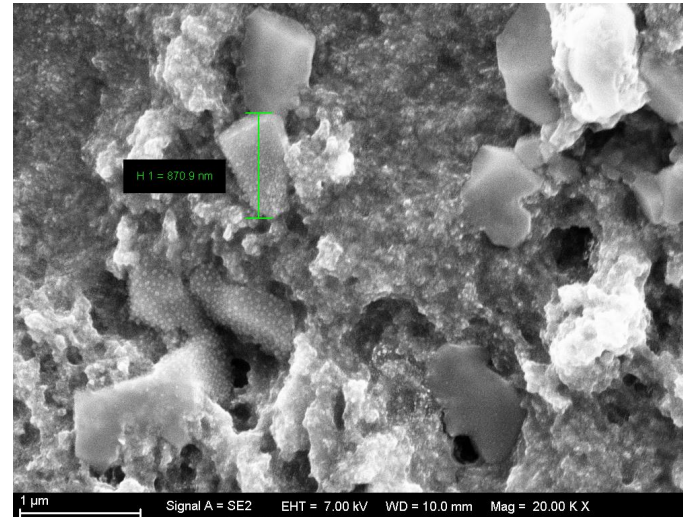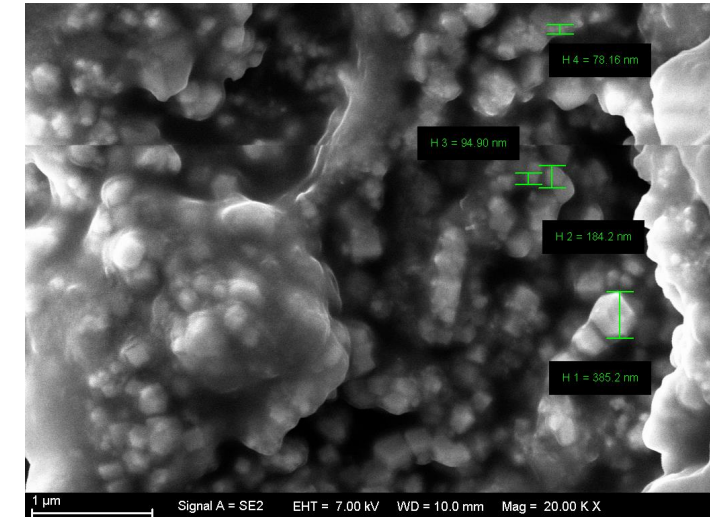

In-situ ferrogel: conditioned and air dried  
Images made by Sitao Wang

→ cubic particles 50 bis 300 nm, 1 μm  
→ TEM for ~10 nm sized particle

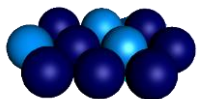

## Sensory Ferrogel

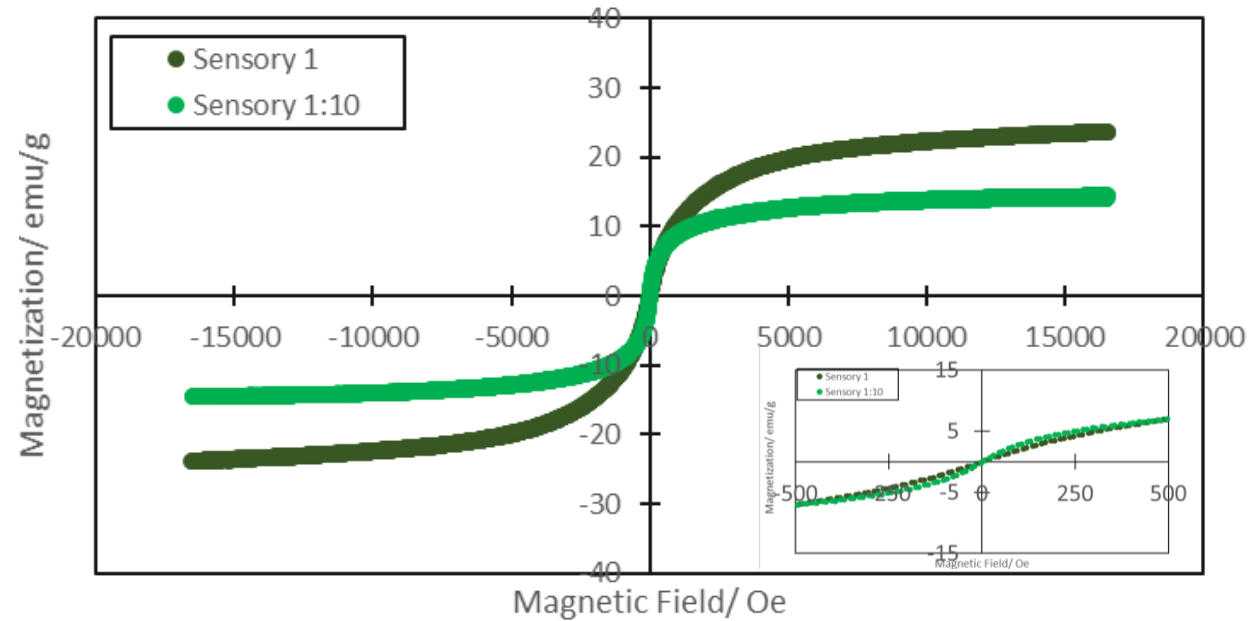

## Actuatory Ferrogel

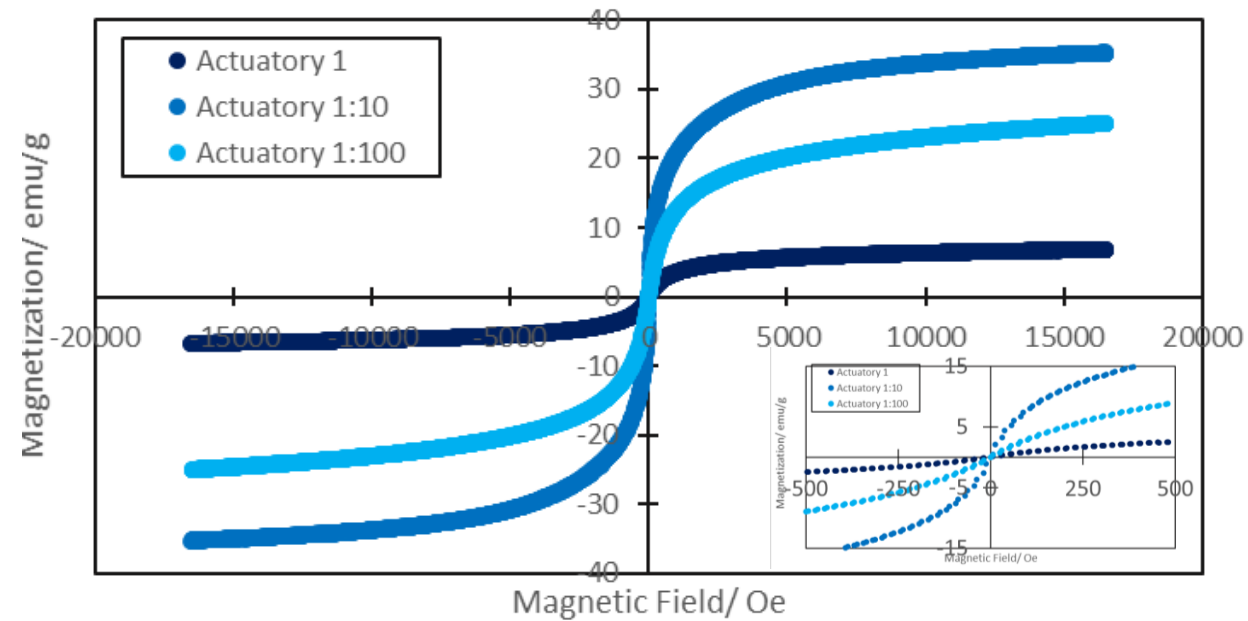

→ Superparamagnetic behaviour

In-situ ferrogel: conditioned and air dried  
VSM measurements made by Mia Schliephake



## Sensory Ferrogel

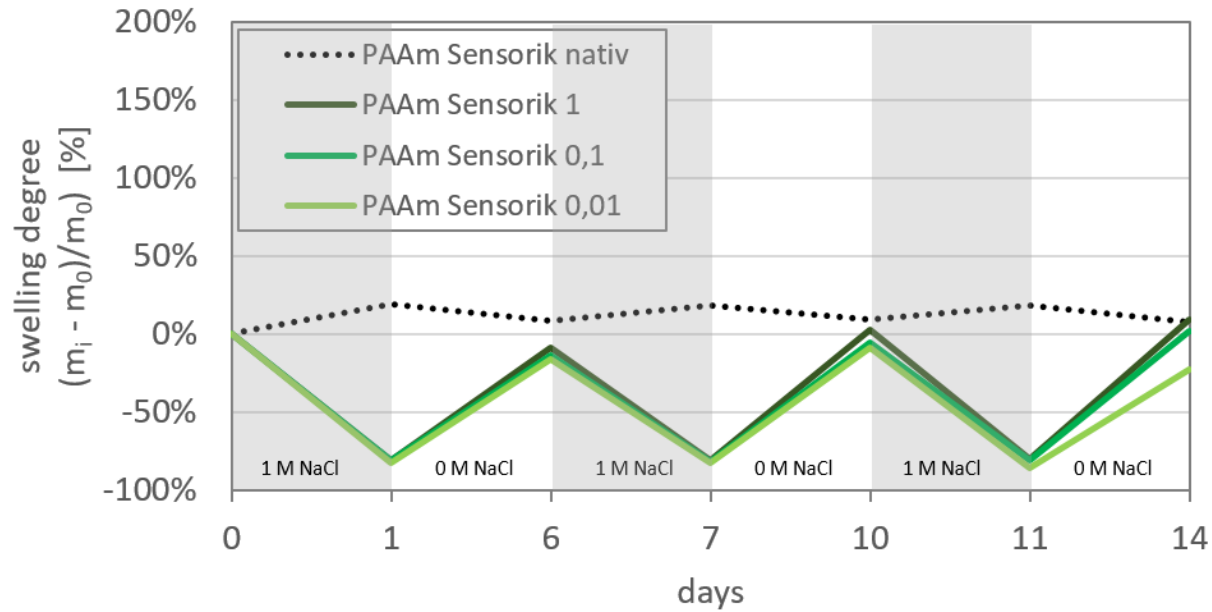

## Actuatory Ferrogel

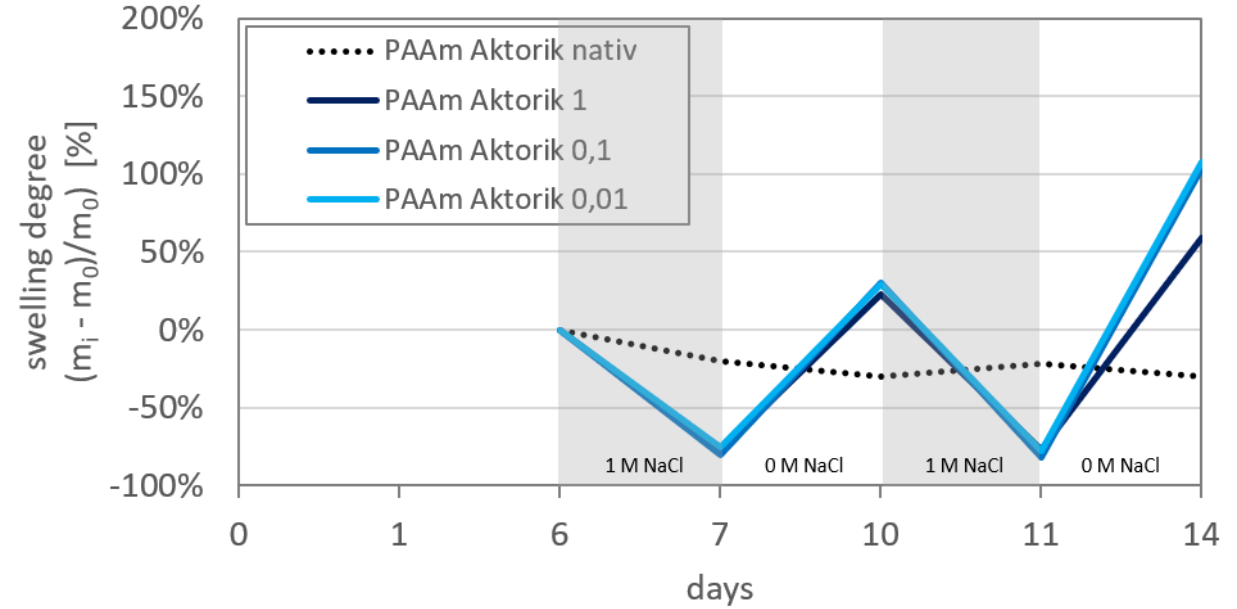

→ Swelling properties comparable to ion-sensitive hydrogels:  
Ionic strength  $\uparrow$  → masking of bonded ionized groups → deswelling

→ ~ 80 % **deswelling** in 1 M NaCl

→ 50 - 100 % **swelling** in ultrapure water

→ Dissolution of actuatory Ferrogel 1 and 0,1

0 M NaCl = ultrapure water





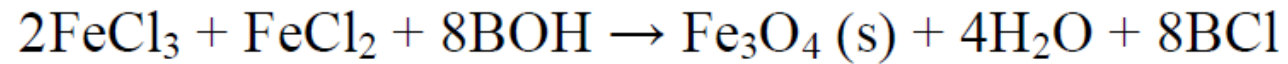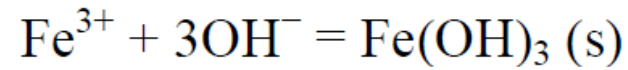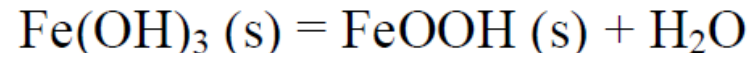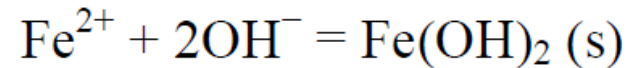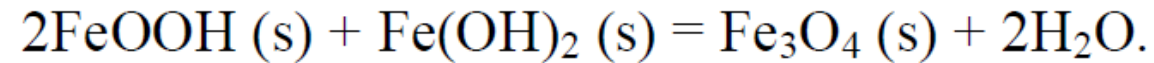

1) hydroxides precipitating

2) decomposing due to ↑ ionic strength

3) Solid state reaction (10-30 min at RT)

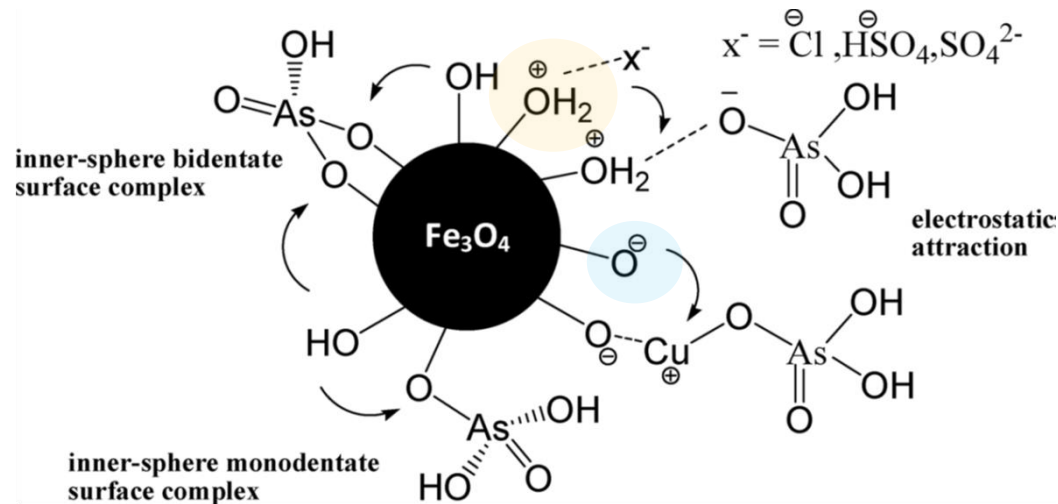

Darezereshki et al. *Environmental Nanotechnology, Monitoring & Management*, 2018

Mascolo et al. *Materials*, 2013



## Sensory Ferrogel

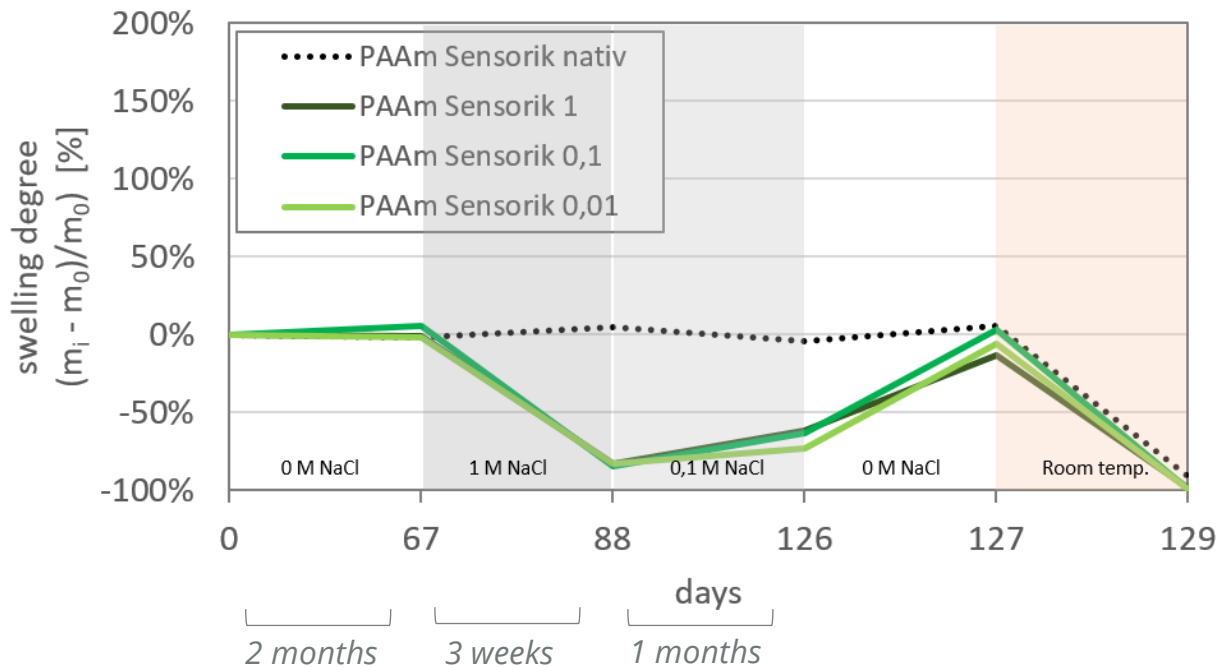

→ Swelling properties are maintained

→ Stability in ultrapure water

0 M NaCl = ultrapure water

## Actuatory Ferrogel

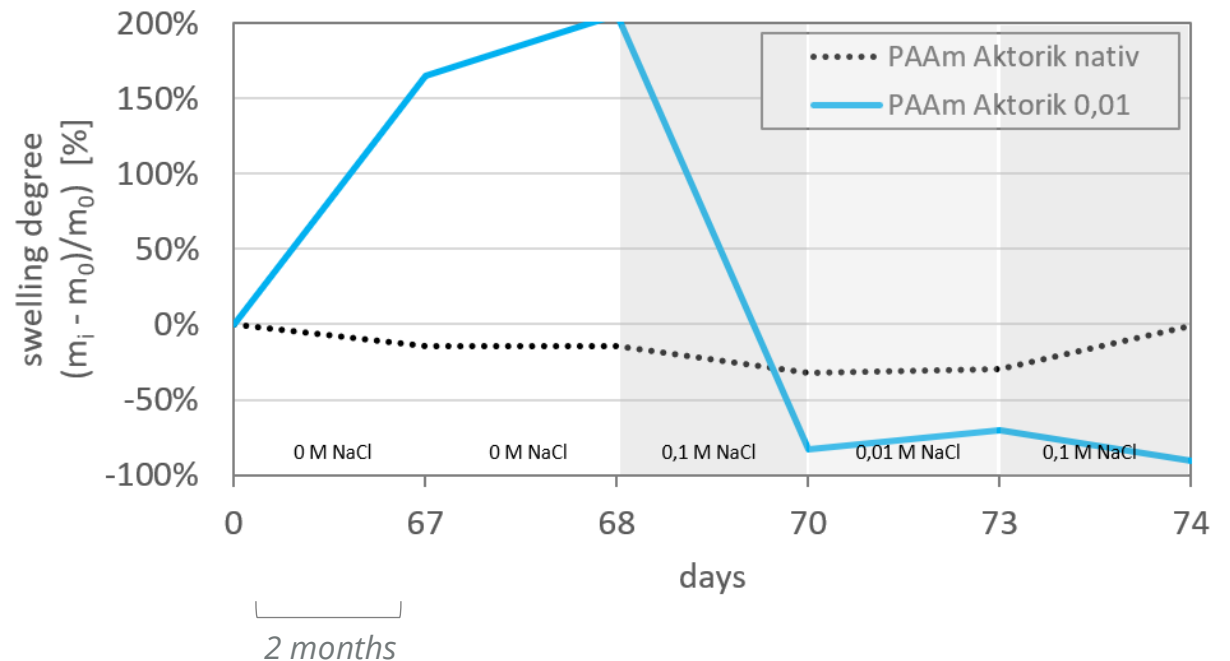

→ **no** long-term stability in ultrapure water

→ ~ 300 % deswelling in 0,1 M NaCl

Long-term Stability

slide 10



# Sensory Ferrogel

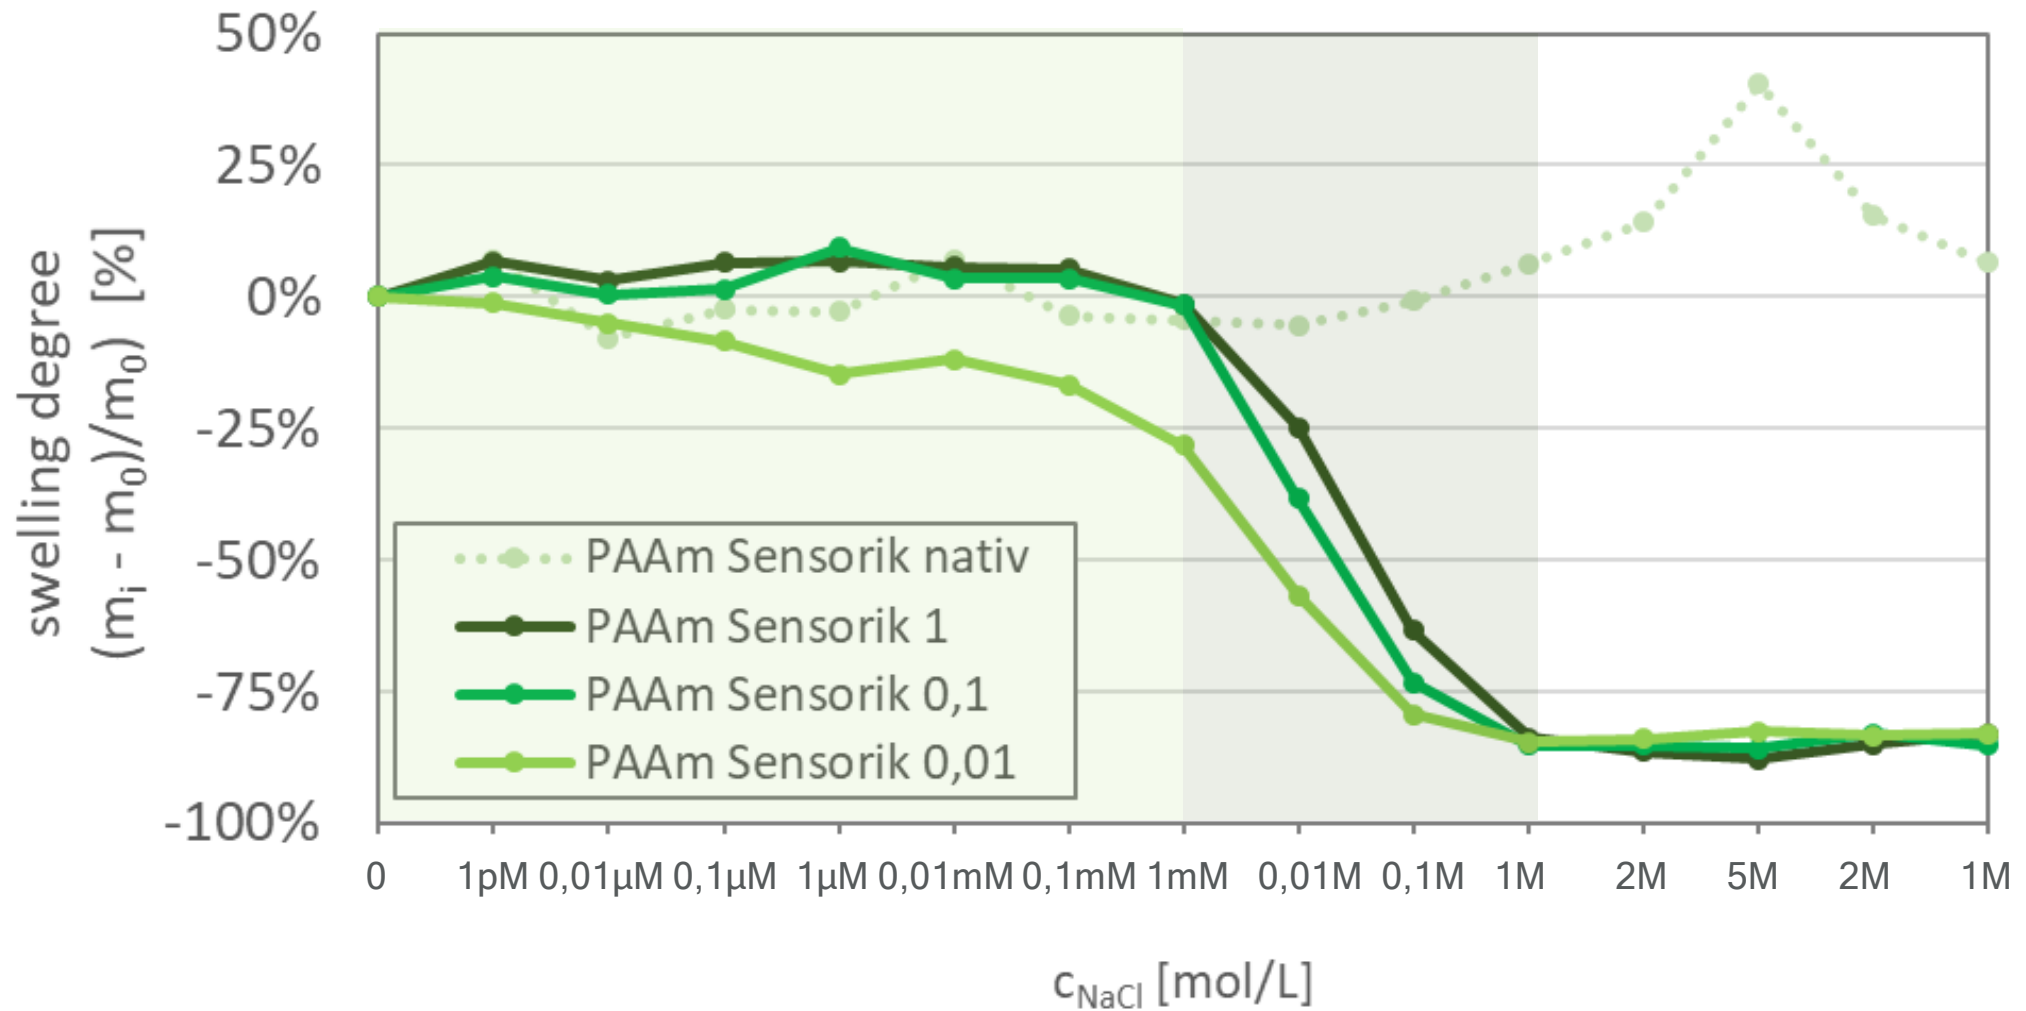

## Nm sized particles

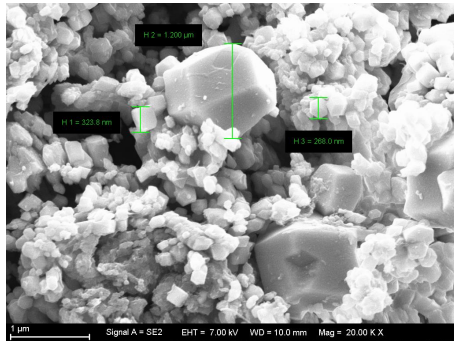

## Superparamagnetic behaviour

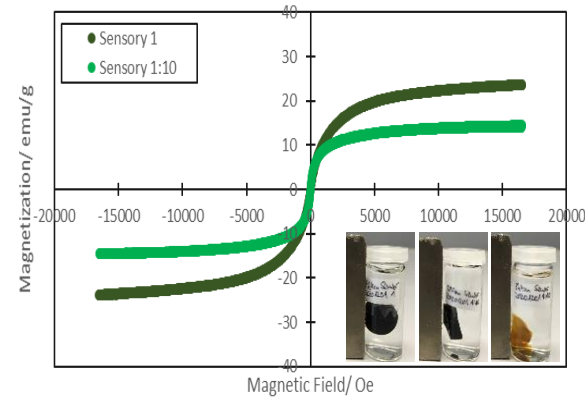

## Ionic sensitive deswelling

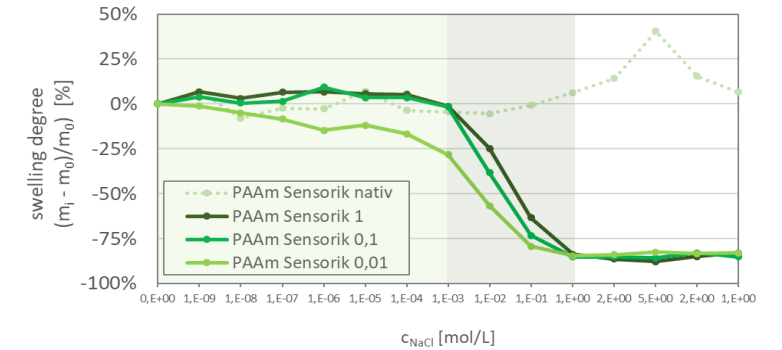

## Sensory Ferrogel

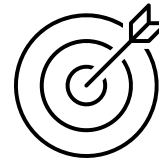

- stimuli-responsive ferrogel for
  - piezoresistive sensors
  - Magnetic field guided control in microfluidics or medicine
  - thermoresponsive deswelling due to HF magnetic fields

## Actuatory Ferrogel

- stimuli-responsive ferrogel for
  - Water remediation

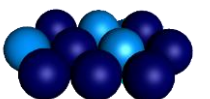



## Hydrogel hydrophilic 3D polymer network

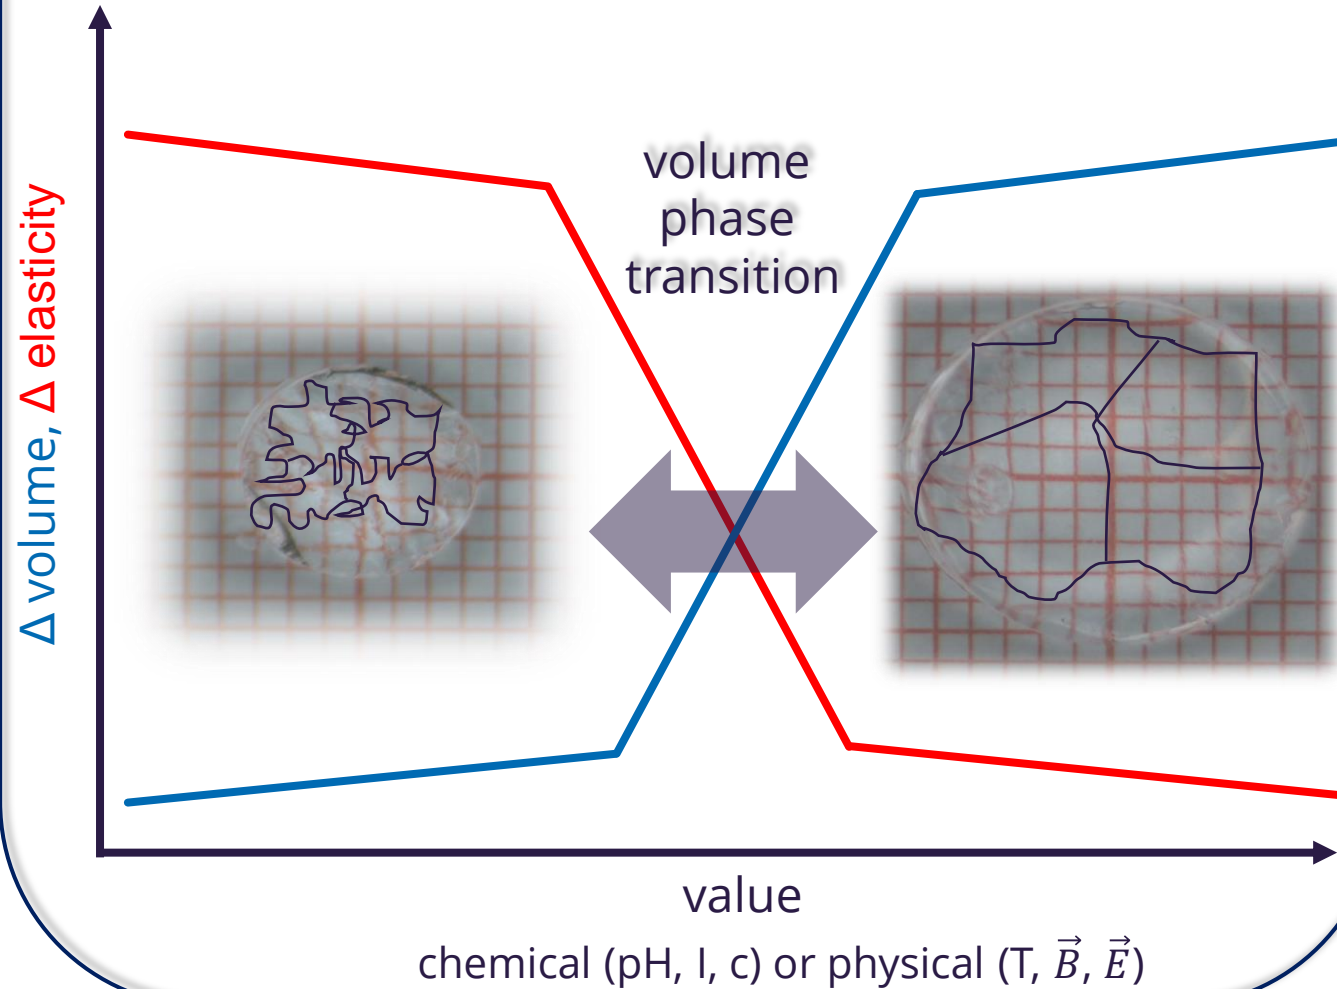

## Microsystem pressure sensor

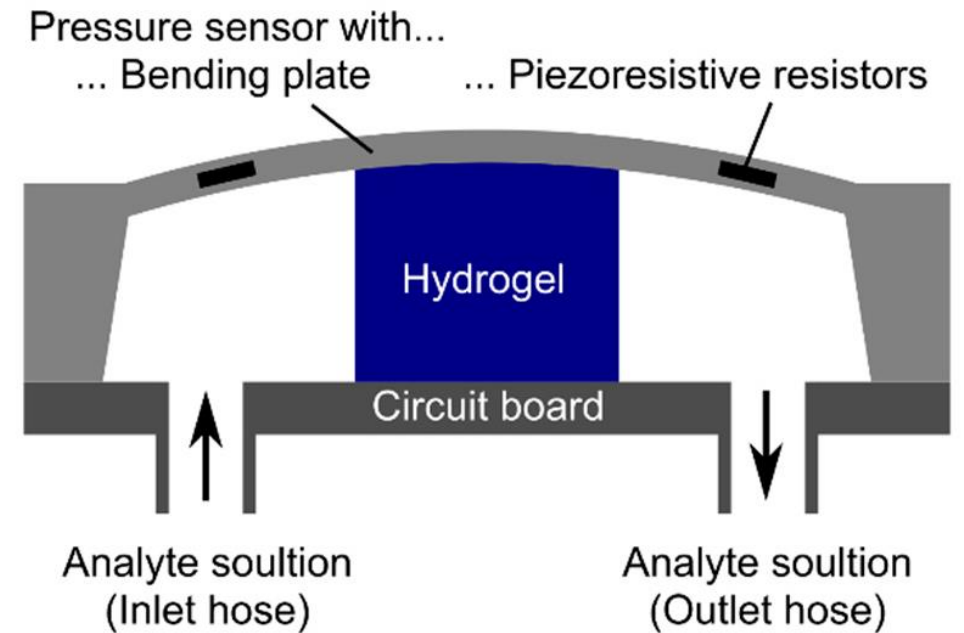

*Sensors* **2019**, 19, 971



# Colleagues and Contributors

Faculty of Electrical Engineering and Information Technology  
Institute of Solid State Electronics

*Prof. Dr.-Ing. habil. Gerald Gerlach*

*PD Dr.-Ing. habil. Margarita Günther*

*Dr. rer. nat. Daniela Franke*

*Dipl.Ing. Sitao Wang*

RTG 1865 'Hydrogel-based Microsystems'

Faculty of Mechanical Engineering  
Institute of Mechatronic Mechanical Engineering

*Prof. Dr. rer. nat. habil. Stefan  
Odenbach*

*Dipl.-Ing. Mia Schliephake*

Werner-Hartmann-Center for Technologies of Electronics  
Dresden

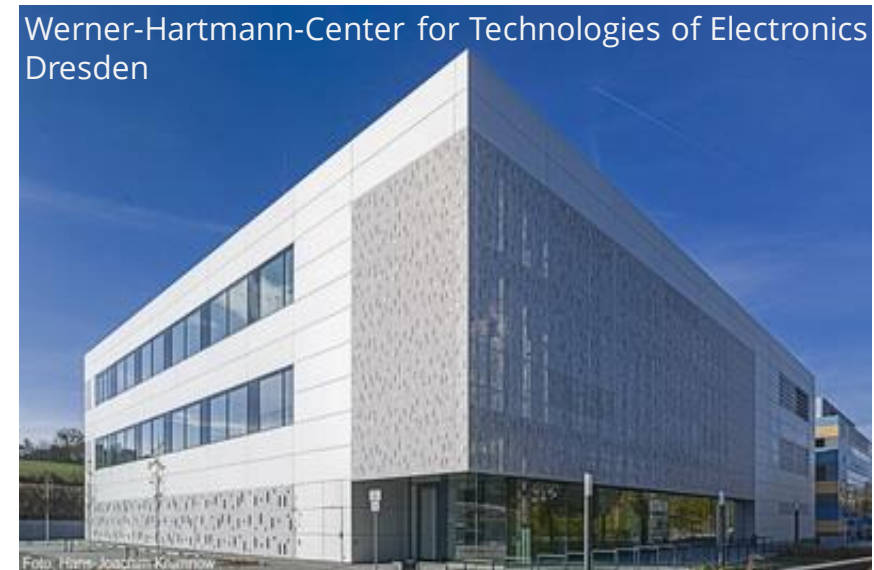

# Thank you for your attention!



# Applications of iron oxide functionalized hydrogels

- Drug-release devices

- Adsorption e.g. heavy metal ions, proteins
- pH sensitive

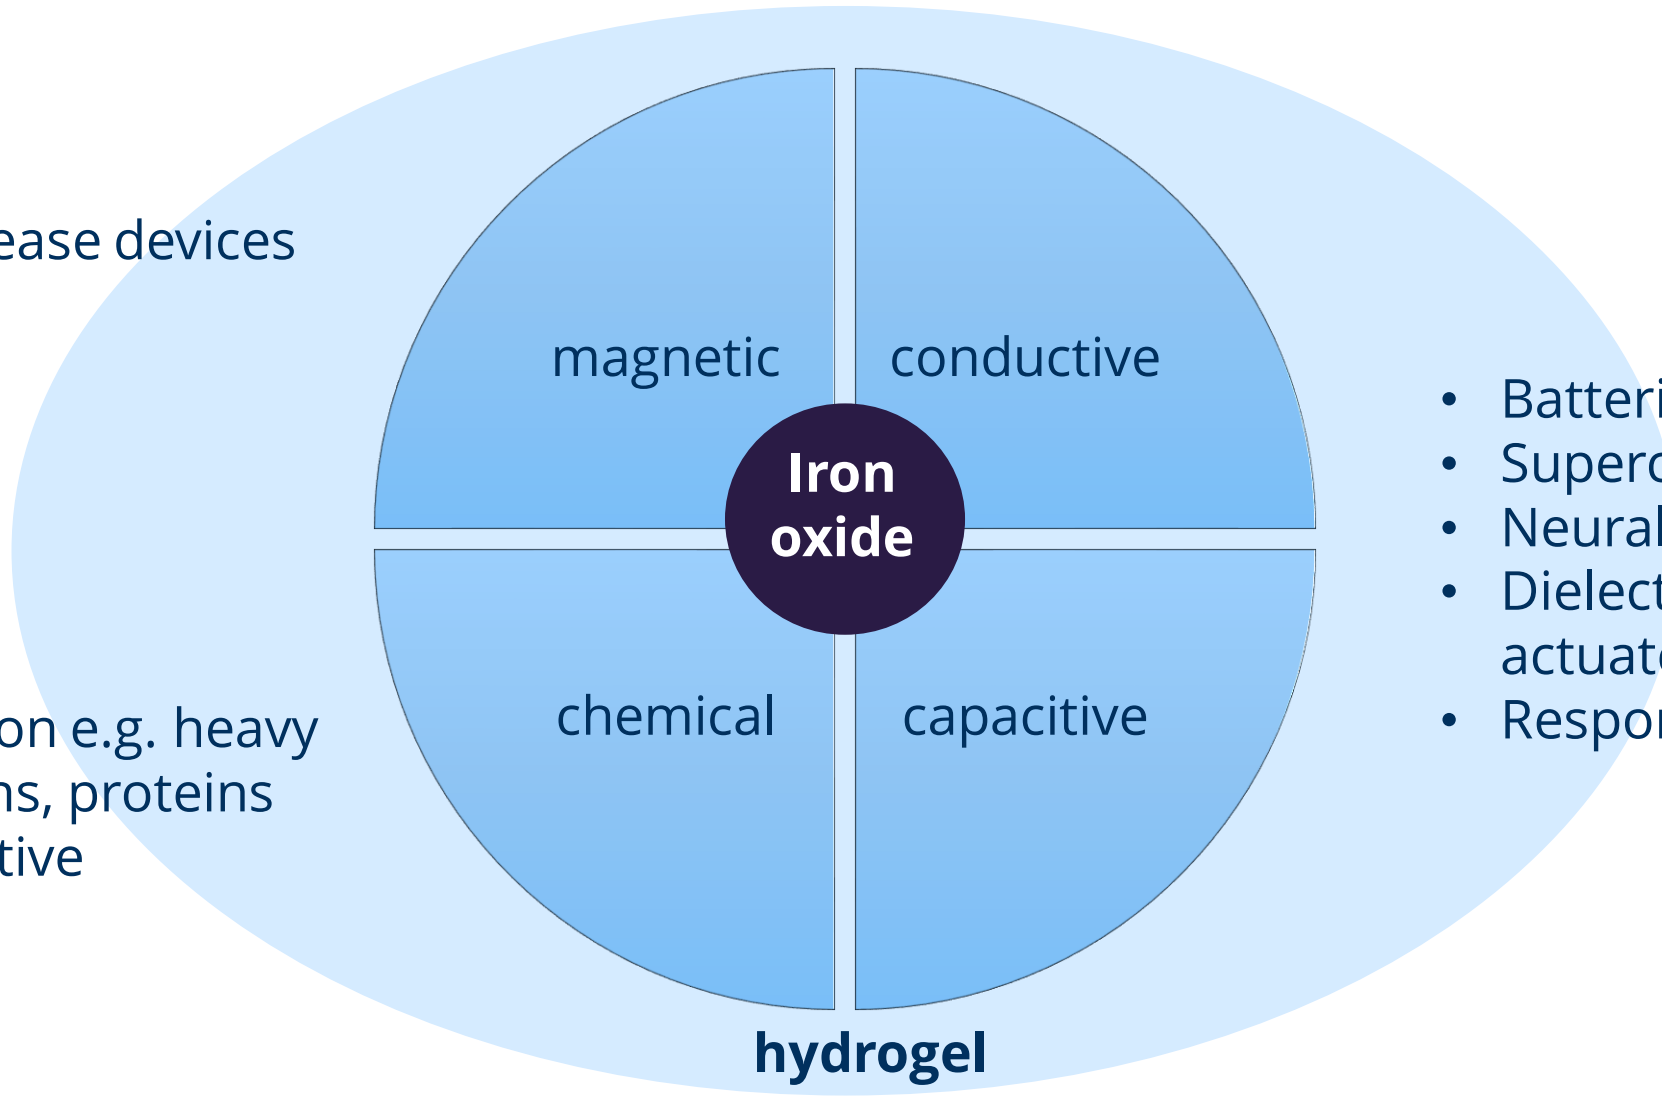

- Batteries
- Supercapacitors
- Neural prostheses
- Dielectric elastomer actuators
- Responsive sensors





# Magnetite

iron<sup>II,III</sup> oxide  
Fe<sub>3</sub>O<sub>4</sub>

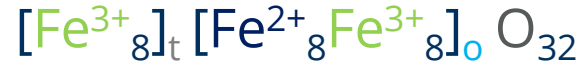

oxidation

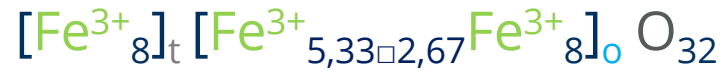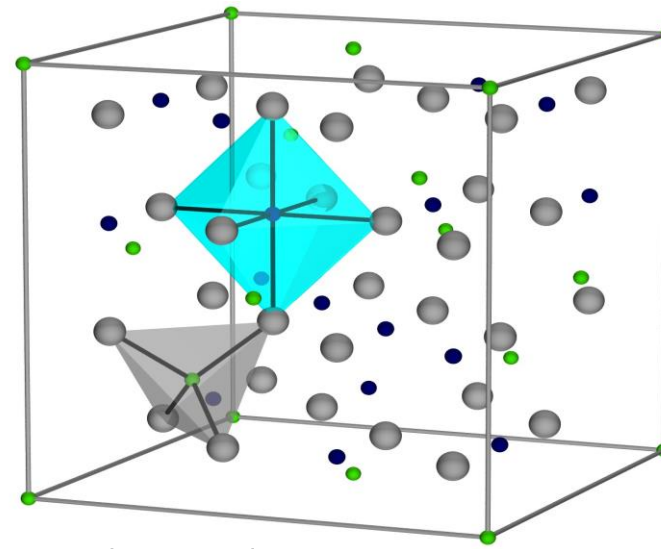

cubic crystal structure

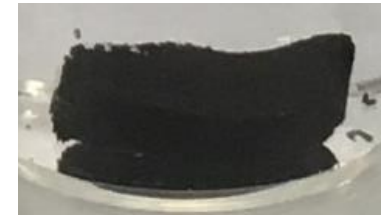

ferromagnetic

# Maghemite

iron<sup>III</sup> oxide  
γ-Fe<sub>2</sub>O<sub>3</sub>

ferrimagnetic

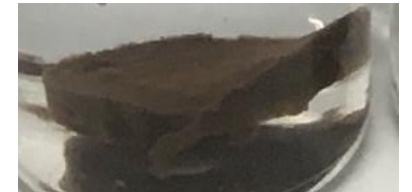

# Hematite

Beta-FeOOH

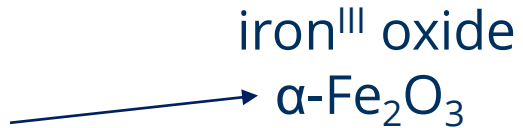

trigonal crystal structure

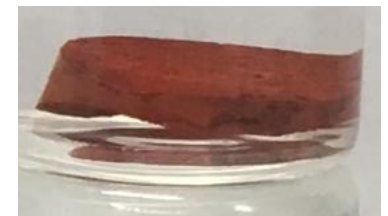

antiferromagnetic



Supplement: s1 [file s1]
